# Supplementary material for: Kidney Function, Kidney Replacement Therapy, and Mortality in Men and Women
Source: PubMed Central journal article supplement (PMC8897304; doi:10.1016/j.ekir.2021.12.024), 2021-12-27
Supplement: mmc1.pdf [file mmc1.pdf]

**Supplementary Table 1: ICD-10 codes used for the Elixhauser Comorbidity Score**

| <b>Comorbidity</b>                              | <b>ICD-10 Codes</b>                                                                                                             |
|-------------------------------------------------|---------------------------------------------------------------------------------------------------------------------------------|
| Congestive heart failure                        | I09.9, I11.0, I13.0, I13.2, I25.5, I42.0, I42.5 - I42.9, I43.x, I50.x, P29.0                                                    |
| Cardiac arrhythmias                             | I44.1 - I44.3, I45.6, I45.9, I47.x - I49.x, R00.0, R00.1, R00.8, T82.1, Z45.0, Z95.0                                            |
| Valvular disease                                | A52.0, I05.x - I08.x, I09.1, I09.8, I34.x - I39.x, Q23.0 - Q23.3, Z95.2 - Z95.4                                                 |
| Pulmonary circulation disorders                 | I26.x, I27.x, I28.0, I28.8, I28.9                                                                                               |
| Peripheral vascular disorders                   | I70.x, I71.x, I73.1, I73.8, I73.9, I77.1, I79.0, I79.2, K55.1, K55.8, K55.9, Z95.8, Z95.9                                       |
| Hypertension, uncomplicated                     | I10.x                                                                                                                           |
| Hypertension, complicated                       | I11.x - I13.x, I15.x                                                                                                            |
| Paralysis                                       | G04.1, G11.4, G80.1, G80.2, G81.x, G82.x, G83.0 - G83.4, G83.9                                                                  |
| Other neurological disorders                    | G10.x - G13.x, G20.x - G22.x, G25.4, G25.5, G31.2, G31.8, G31.9, G32.x, G35.x - G37.x, G40.x, G41.x, G93.1, G93.4, R47.0, R56.x |
| Chronic pulmonary disease                       | I27.8, I27.9, J40.x - J47.x, J60.x - J67.x, J68.4, J70.1, J70.3                                                                 |
| Diabetes, uncomplicated                         | E10.0, E10.1, E10.9, E11.0, E11.1, E11.9, E12.0, E12.1, E12.9, E13.0, E13.1, E13.9, E14.0, E14.1, E14.9                         |
| Diabetes, complicated                           | E10.2 - E10.8, E11.2 - E11.8, E12.2 - E12.8, E13.2 - E13.8, E14.2 - E14.8                                                       |
| Hypothyroidism                                  | E00.x - E03.x, E89.0                                                                                                            |
| Liver disease                                   | B18.x, I85.x, I86.4, I98.2, K70.x, K71.1, K71.3 - K71.5, K71.7, K72.x - K74.x, K76.0, K76.2 - K76.9, Z94.4                      |
| Peptic ulcer disease, excluding bleeding        | K25.7, K25.9, K26.7, K26.9, K27.7, K27.9, K28.7, K28.9                                                                          |
| AIDS/HIV                                        | B20.x - B22.x, B24.x                                                                                                            |
| Lymphoma                                        | C81.x - C85.x, C88.x, C96.x, C90.0, C90.2                                                                                       |
| Metastatic cancer                               | C77.x - C80.x                                                                                                                   |
| Solid tumour without metastasis                 | C00.x - C26.x, C30.x - C34.x, C37.x - C41.x, C43.x, C45.x - C58.x, C60.x - C76.x, C97.x                                         |
| Rheumatoid arthritis/collagen vascular diseases | L94.0, L94.1, L94.3, M05.x, M06.x, M08.x, M12.0, M12.3, M30.x, M31.0 - M31.3, M32.x - M35.x, M45.x, M46.1, M46.8, M46.9         |
| Coagulopathy                                    | D65 - D68.x, D69.1, D69.3 - D69.6                                                                                               |
| Obesity                                         | E66.x                                                                                                                           |
| Weight loss                                     | E40.x - E46.x, R63.4, R64                                                                                                       |
| Fluid and electrolyte disorders                 | E22.2, E86.x, E87.x                                                                                                             |
| Blood loss anaemia                              | D50.0                                                                                                                           |
| Deficiency anaemia                              | D50.8, D50.9, D51.x - D53.x                                                                                                     |
| Alcohol abuse                                   | F10, E52, G62.1, I42.6, K29.2, K70.0, K70.3, K70.9, T51.x, Z50.2, Z71.4, Z72.1                                                  |
| Drug abuse                                      | F11.x - F16.x, F18.x, F19.x, Z71.5, Z72.2                                                                                       |
| Psychoses                                       | F20.x, F22.x - F25.x, F28.x, F29.x, F30.2, F31.2, F31.5                                                                         |
| Depression                                      | F20.4, F31.3 - F31.5, F32.x, F33.x, F34.1, F41.2, F43.2                                                                         |

**Supplementary Table 2: Sensitivity Analyses of main results.** Male-to-female cause specific hazard ratios (csHR) with 95% confidence intervals of the competing events kidney replacement therapy (KRT) and pre-KRT deaths, as well as all-cause death hazard ratios (HR), in different sensitivity analyses scenarios; cardiovascular disease (CVD) includes heart failure, peripheral vascular disorders or valvular disease; fully adjusted models include diabetes, hypertension, the three CVD factors and all other 23 comorbidities depicted in **Table 1**.

| Sensitivity Analysis 1                                                                                 |         | adjustments                                                                | KRT m-to-f csHR     | pre-KRT death m-to-f csHR | all-cause death m-to-f HR |
|--------------------------------------------------------------------------------------------------------|---------|----------------------------------------------------------------------------|---------------------|---------------------------|---------------------------|
| use of all records were subjects were older than 40 years of age (instead of 45 year in main analysis) | Model 1 | unadjusted                                                                 | 1.816 (1.484,2.224) | 1.039 (1.022,1.056)       | 1.039 (1.023,1.056)       |
|                                                                                                        | Model 2 | age                                                                        | 1.771 (1.446,2.170) | 1.460 (1.437,1.485)       | 1.460 (1.436,1.484)       |
|                                                                                                        | Model 3 | age + diabetes                                                             | 1.577 (1.285,1.935) | 1.434 (1.410,1.458)       | 1.433 (1.410,1.457)       |
|                                                                                                        | Model 4 | age + diabetes + hypertension                                              | 1.592 (1.297,1.954) | 1.433 (1.409,1.457)       | 1.432 (1.409,1.456)       |
|                                                                                                        | Model 5 | age + diabetes + hypertension + CVD                                        | 1.557 (1.268,1.912) | 1.395 (1.372,1.418)       | 1.395 (1.372,1.418)       |
|                                                                                                        | Model 6 | age + diabetes + hypertension + CVD + eGFR + eGFR slope                    | 1.424 (1.152,1.761) | 1.392 (1.369,1.415)       | 1.391 (1.368,1.414)       |
|                                                                                                        | Model 7 | age + diabetes + hypertension + CVD + eGFR + eGFR slope + 23 comorbidities | 1.441 (1.154,1.801) | 1.356 (1.332,1.379)       | 1.355 (1.332,1.378)       |

| Sensitivity Analysis 2                                                                                 |         | adjustments                                                                | KRT m-to-f csHR     | pre-KRT death m-to-f csHR | all-cause death m-to-f HR |
|--------------------------------------------------------------------------------------------------------|---------|----------------------------------------------------------------------------|---------------------|---------------------------|---------------------------|
| use of all records were subjects were older than 50 years of age (instead of 45 year in main analysis) | Model 1 | unadjusted                                                                 | 1.754 (1.412,2.179) | 1.042 (1.025,1.059)       | 1.042 (1.025,1.059)       |
|                                                                                                        | Model 2 | age                                                                        | 1.694 (1.362,2.106) | 1.463 (1.438,1.487)       | 1.462 (1.438,1.487)       |
|                                                                                                        | Model 3 | age + diabetes                                                             | 1.511 (1.213,1.882) | 1.436 (1.412,1.460)       | 1.436 (1.412,1.460)       |
|                                                                                                        | Model 4 | age + diabetes + hypertension                                              | 1.544 (1.240,1.924) | 1.435 (1.411,1.459)       | 1.434 (1.411,1.459)       |
|                                                                                                        | Model 5 | age + diabetes + hypertension + CVD                                        | 1.500 (1.204,1.870) | 1.397 (1.373,1.420)       | 1.396 (1.373,1.420)       |
|                                                                                                        | Model 6 | age + diabetes + hypertension + CVD + eGFR + eGFR slope                    | 1.333 (1.069,1.663) | 1.389 (1.366,1.413)       | 1.388 (1.365,1.412)       |
|                                                                                                        | Model 7 | age + diabetes + hypertension + CVD + eGFR + eGFR slope + 23 comorbidities | 1.342 (1.063,1.694) | 1.355 (1.332,1.379)       | 1.354 (1.331,1.378)       |

| Sensitivity Analysis 3                                                                                                             |         | adjustments                                                   | KRT m-to-f csHR     | pre-KRT death m-to-f csHR | all-cause death m-to-f HR |
|------------------------------------------------------------------------------------------------------------------------------------|---------|---------------------------------------------------------------|---------------------|---------------------------|---------------------------|
| without the use of eGFR slope in Model 7, includes also subjects with only one measurement or which were observed less than a year | Model 1 | unadjusted                                                    | 1.847 (1.545,2.210) | 1.018 (1.004,1.032)       | 1.019 (1.005,1.033)       |
|                                                                                                                                    | Model 2 | age                                                           | 1.836 (1.534,2.198) | 1.471 (1.451,1.492)       | 1.472 (1.451,1.492)       |
|                                                                                                                                    | Model 3 | age + diabetes                                                | 1.633 (1.363,1.957) | 1.447 (1.427,1.467)       | 1.447 (1.427,1.467)       |
|                                                                                                                                    | Model 4 | age + diabetes + hypertension                                 | 1.666 (1.390,1.997) | 1.449 (1.429,1.470)       | 1.450 (1.430,1.470)       |
|                                                                                                                                    | Model 5 | age + diabetes + hypertension + CVD                           | 1.639 (1.367,1.965) | 1.418 (1.399,1.438)       | 1.419 (1.399,1.439)       |
|                                                                                                                                    | Model 6 | age + diabetes + hypertension + CVD + eGFR                    | 1.336 (1.112,1.604) | 1.408 (1.388,1.427)       | 1.408 (1.388,1.427)       |
|                                                                                                                                    | Model 7 | age + diabetes + hypertension + CVD + eGFR + 23 comorbidities | 1.383 (1.143,1.674) | 1.369 (1.350,1.389)       | 1.370 (1.350,1.389)       |

| Sensitivity Analysis 4                                                                                                  |         | adjustments                                                 | KRT m-to-f csHR     | pre-KRT death m-to-f csHR | all-cause death m-to-f HR |
|-------------------------------------------------------------------------------------------------------------------------|---------|-------------------------------------------------------------|---------------------|---------------------------|---------------------------|
| subject age as timescale for the time-to-event data; cox model which allowed for flexible entrance times into the study | Model 1 | unadjusted                                                  | 1.724 (1.397,2.127) | 1.461 (1.437,1.486)       | 1.461 (1.437,1.485)       |
|                                                                                                                         | Model 2 | diabetes                                                    | 1.541 (1.247,1.905) | 1.435 (1.411,1.459)       | 1.434 (1.410,1.458)       |
|                                                                                                                         | Model 3 | diabetes + hypertension                                     | 1.568 (1.268,1.938) | 1.433 (1.410,1.457)       | 1.433 (1.409,1.457)       |
|                                                                                                                         | Model 4 | diabetes + hypertension + CVD                               | 1.528 (1.235,1.890) | 1.396 (1.373,1.419)       | 1.395 (1.372,1.419)       |
|                                                                                                                         | Model 5 | age + CVD + diabetes + eGFR + eGFR slope                    | 1.355 (1.095,1.678) | 1.392 (1.369,1.415)       | 1.391 (1.368,1.414)       |
|                                                                                                                         | Model 6 | age + CVD + diabetes + eGFR + eGFR slope + 23 comorbidities | 1.392 (1.112,1.741) | 1.357 (1.334,1.381)       | 1.356 (1.333,1.380)       |

| Sensitivity Analysis 5                               |         |                                                                               | DIALYSIS<br>m-to-f csHR | KTX<br>m-to-f csHR            | pre-KRT death<br>m-to-f csHR | all-cause death<br>m-to-f HR |
|------------------------------------------------------|---------|-------------------------------------------------------------------------------|-------------------------|-------------------------------|------------------------------|------------------------------|
| KTX and DIALYSIS<br>as separated<br>competing events | Model 1 | unadjusted                                                                    | 1.736 (1.383,2.178)     | 2.170 (1.256,3.749)           | 1.039 (1.022,1.056)          | 1.039 (1.023,1.056)          |
|                                                      | Model 2 | age                                                                           | 1.709 (1.361,2.147)     | 1.945 (1.126,3.361)           | 1.462 (1.438,1.487)          | 1.462 (1.438,1.486)          |
|                                                      | Model 3 | age + diabetes                                                                | 1.506 (1.197,1.895)     | 1.883 (1.087,3.264)           | 1.436 (1.412,1.460)          | 1.435 (1.412,1.459)          |
|                                                      | Model 4 | age + diabetes + hypertension                                                 | 1.538 (1.222,1.936)     | 1.878 (1.084,3.254)           | 1.434 (1.411,1.458)          | 1.434 (1.410,1.458)          |
|                                                      | Model 5 | age + diabetes + hypertension + CVD                                           | 1.488 (1.181,1.874)     | 1.913 (1.104,3.316)           | 1.396 (1.373,1.420)          | 1.396 (1.373,1.419)          |
|                                                      | Model 6 | age + diabetes + hypertension + CVD +<br>eGFR + eGFR slope                    | 1.317 (1.045,1.660)     | 1.717 (0.991,2.977)           | 1.391 (1.368,1.414)          | 1.390 (1.367,1.413)          |
|                                                      | Model 7 | age + diabetes + hypertension + CVD +<br>eGFR + eGFR slope + 23 comorbidities | 1.390 (1.089,1.775)     | NA<br>(singular model matrix) | 1.355 (1.332,1.379)          | 1.354 (1.331,1.378)          |

## Modified STROBE Statement—checklist of items that should be included in reports of observational studies (Cohort/Cross-sectional and case-control studies)

|                           | Item No | Recommendation                                                                                                                                                                                                                                                                                                                                                                                                                                                                     | Comment from the authors                                                                                |
|---------------------------|---------|------------------------------------------------------------------------------------------------------------------------------------------------------------------------------------------------------------------------------------------------------------------------------------------------------------------------------------------------------------------------------------------------------------------------------------------------------------------------------------|---------------------------------------------------------------------------------------------------------|
| <b>Title and abstract</b> | 1       | (a) Indicate the study's design with a commonly used term in the title or the abstract                                                                                                                                                                                                                                                                                                                                                                                             | The study design is mentioned in the title as well as the abstract                                      |
|                           |         | (b) Provide in the abstract an informative and balanced summary of what was done and what was found                                                                                                                                                                                                                                                                                                                                                                                | see Abstract, page 2                                                                                    |
| <b>Introduction</b>       |         |                                                                                                                                                                                                                                                                                                                                                                                                                                                                                    |                                                                                                         |
| Background/rationale      | 2       | Explain the scientific background and rationale for the investigation being reported                                                                                                                                                                                                                                                                                                                                                                                               | The scientific background and the study rationale are explained in the introduction, pages 4 and 5      |
| Objectives                | 3       | State specific objectives, including any prespecified hypotheses                                                                                                                                                                                                                                                                                                                                                                                                                   | The study objective is explained in the introduction, page 5                                            |
| <b>Methods</b>            |         |                                                                                                                                                                                                                                                                                                                                                                                                                                                                                    |                                                                                                         |
| Study design              | 4       | Present key elements of study design early in the paper                                                                                                                                                                                                                                                                                                                                                                                                                            | The methods section starts with a detailed description of the study design, page 5                      |
| Setting                   | 5       | Describe the setting, locations, and relevant dates, including periods of recruitment, exposure, follow-up, and data collection                                                                                                                                                                                                                                                                                                                                                    | The study population is described in the methods section, pages 5 and 6                                 |
| Participants              | 6       | <p>(a) <i>Cohort study</i>—Give the eligibility criteria, and the sources and methods of selection of participants. Describe methods of follow-up</p> <p><i>Case-control study</i>—Give the eligibility criteria, and the sources and methods of case ascertainment and control selection. Give the rationale for the choice of cases and controls</p> <p><i>Cross-sectional study</i>—Give the eligibility criteria, and the sources and methods of selection of participants</p> | Inclusion and exclusion criteria are described on page 6                                                |
| Variables                 | 7       | Clearly define all outcomes, exposures, predictors, potential confounders, and effect modifiers. Give diagnostic criteria, if applicable                                                                                                                                                                                                                                                                                                                                           | All exposures and outcomes are described in detail on pages 6 and 7                                     |
| Data sources/measurement  | 8*      | For each variable of interest, give sources of data and details of methods of assessment (measurement).                                                                                                                                                                                                                                                                                                                                                                            | Sources of all variables are explained within the study design and study cohort descriptions, pages 5-7 |
| Bias                      | 9       | Describe any efforts to address potential sources of bias                                                                                                                                                                                                                                                                                                                                                                                                                          | Biases are addressed by careful definition of the study cohort (page 5) as well as adjustments          |

|                        |     |                                                                                                                                                                                                                                                                                                                   |                                                                                                                                       |
|------------------------|-----|-------------------------------------------------------------------------------------------------------------------------------------------------------------------------------------------------------------------------------------------------------------------------------------------------------------------|---------------------------------------------------------------------------------------------------------------------------------------|
|                        |     |                                                                                                                                                                                                                                                                                                                   | of the statistical models (page 7-9)                                                                                                  |
| Study size             | 10  | Explain how the study size was arrived at (if applicable)                                                                                                                                                                                                                                                         | -                                                                                                                                     |
| Quantitative variables | 11  | Explain how quantitative variables were handled in the analyses. If applicable, describe which groupings were chosen and why                                                                                                                                                                                      | -                                                                                                                                     |
| Statistical methods    | 12  | (a) Describe all statistical methods, including those used to control for confounding                                                                                                                                                                                                                             | All methods used are described in detail, page 8                                                                                      |
|                        |     | (b) Describe any methods used to examine subgroups and interactions                                                                                                                                                                                                                                               | Subgroup and effect modification analysis are described in the statistical methods, pages 8 and 9                                     |
|                        |     | (c) Explain how missing data were addressed                                                                                                                                                                                                                                                                       | We only encountered missing data in the initial data cleaning process, shown on the study flowchart, Figure 1                         |
|                        |     | (d) <i>Cohort study</i> —If applicable, explain how loss to follow-up was addressed<br><br><i>Case-control study</i> —If applicable, explain how matching of cases and controls was addressed<br><br><i>Cross-sectional study</i> —If applicable, describe analytical methods taking account of sampling strategy | We had complete information on the outcome variables, hence we didn't encounter loss to follow-up                                     |
|                        |     | (e) Describe any sensitivity analyses                                                                                                                                                                                                                                                                             | We implemented subgroup analysis of the primary and secondary objective, which also served as sensitivity analysis, see pages 8 and 9 |
| <b>Results</b>         |     |                                                                                                                                                                                                                                                                                                                   |                                                                                                                                       |
| Participants           | 13* | (a) Report numbers of individuals at each stage of study—eg numbers potentially eligible, examined for eligibility, confirmed eligible, included in the study, completing follow-up, and analyzed                                                                                                                 | Detailed numbers of subjects after every exclusion or inclusion criterion were reported in Figure 1                                   |
|                        |     | (c) <b>Use of a flow diagram</b>                                                                                                                                                                                                                                                                                  | See Figure 1                                                                                                                          |
| Descriptive data       | 14* | (a) Give characteristics of study participants (eg demographic, clinical, social) and information on exposures and potential confounders                                                                                                                                                                          | The study cohort was summarized in detail in Table 1                                                                                  |
|                        |     | (b) Indicate number of participants with missing data for each variable of interest                                                                                                                                                                                                                               | -                                                                                                                                     |

|                   |     |                                                                                                                                                                                                              |                                                                                                                                                                                          |
|-------------------|-----|--------------------------------------------------------------------------------------------------------------------------------------------------------------------------------------------------------------|------------------------------------------------------------------------------------------------------------------------------------------------------------------------------------------|
|                   |     | (c) <i>Cohort study</i> —Summarise follow-up time (eg, average and total amount)                                                                                                                             | Follow-up times were reported in Table 2                                                                                                                                                 |
| Outcome data      | 15* | <i>Cohort study</i> —Report numbers of outcome events or summary measures over time                                                                                                                          | Outcome events were reported in Table 2                                                                                                                                                  |
|                   |     | <i>Case-control study</i> —Report numbers in each exposure category, or summary measures of exposure                                                                                                         | -                                                                                                                                                                                        |
|                   |     | <i>Cross-sectional study</i> —Report numbers of outcome events or summary measures                                                                                                                           | -                                                                                                                                                                                        |
| Main results      | 16  | (a) Give unadjusted estimates and, if applicable, confounder-adjusted estimates and their precision (eg, 95% confidence interval). Make clear which confounders were adjusted for and why they were included | Unadjusted and adjusted estimates were reported in Table 3                                                                                                                               |
| Other analyses    | 17  | Report other analyses done—eg analyses of subgroups and interactions, and sensitivity analyses                                                                                                               | Subgroup analysis were shown in Figure 3 and Figure 4                                                                                                                                    |
| <b>Discussion</b> |     |                                                                                                                                                                                                              |                                                                                                                                                                                          |
| Key results       | 18  | Summarise key results with reference to study objectives                                                                                                                                                     | The key results were described at the beginning of the discussion, page 11                                                                                                               |
| Limitations       | 19  | Discuss limitations of the study, taking into account sources of potential bias or imprecision. Discuss both direction and magnitude of any potential bias                                                   | The limitations of our study are discussed on page 14                                                                                                                                    |
| Interpretation    | 20  | Give a cautious overall interpretation of results considering objectives, limitations, multiplicity of analyses, results from similar studies, and other relevant evidence                                   | Interpretation of the results, implications for the objectives, comparisons and evidence to results from other studies, and the limitations were outlined in the discussion, pages 12-15 |
| Generalisability  | 21  | Discuss the generalisability (external validity) of the study results                                                                                                                                        | The large sample size and the discussed measures to control for confounding support the generalizability of the study.                                                                   |

\*Give information separately for cases and controls in case-control studies and, if applicable, for exposed and unexposed groups in cohort and cross-sectional studies.

**Note:** An Explanation and Elaboration article discusses each checklist item and gives methodological background and published examples of transparent reporting. The STROBE checklist is best used in conjunction with this article (freely available on the Web sites of PLoS Medicine at <http://www.plosmedicine.org/>, Annals of Internal Medicine at <http://www.annals.org/>, and Epidemiology at <http://www.epidem.com/>). Information on the STROBE Initiative is available at [www.strobe-statement.org](http://www.strobe-statement.org).
